# Supplementary material
Source: publisher figshare collection journal article supplement (https://acs.figshare.com/ndownloader/files/4384300)
Supplement: Supplementary file 1 [file 4384300]

**Fig. S3 Topological analysis of the *M. tuberculosis* PPI Network**

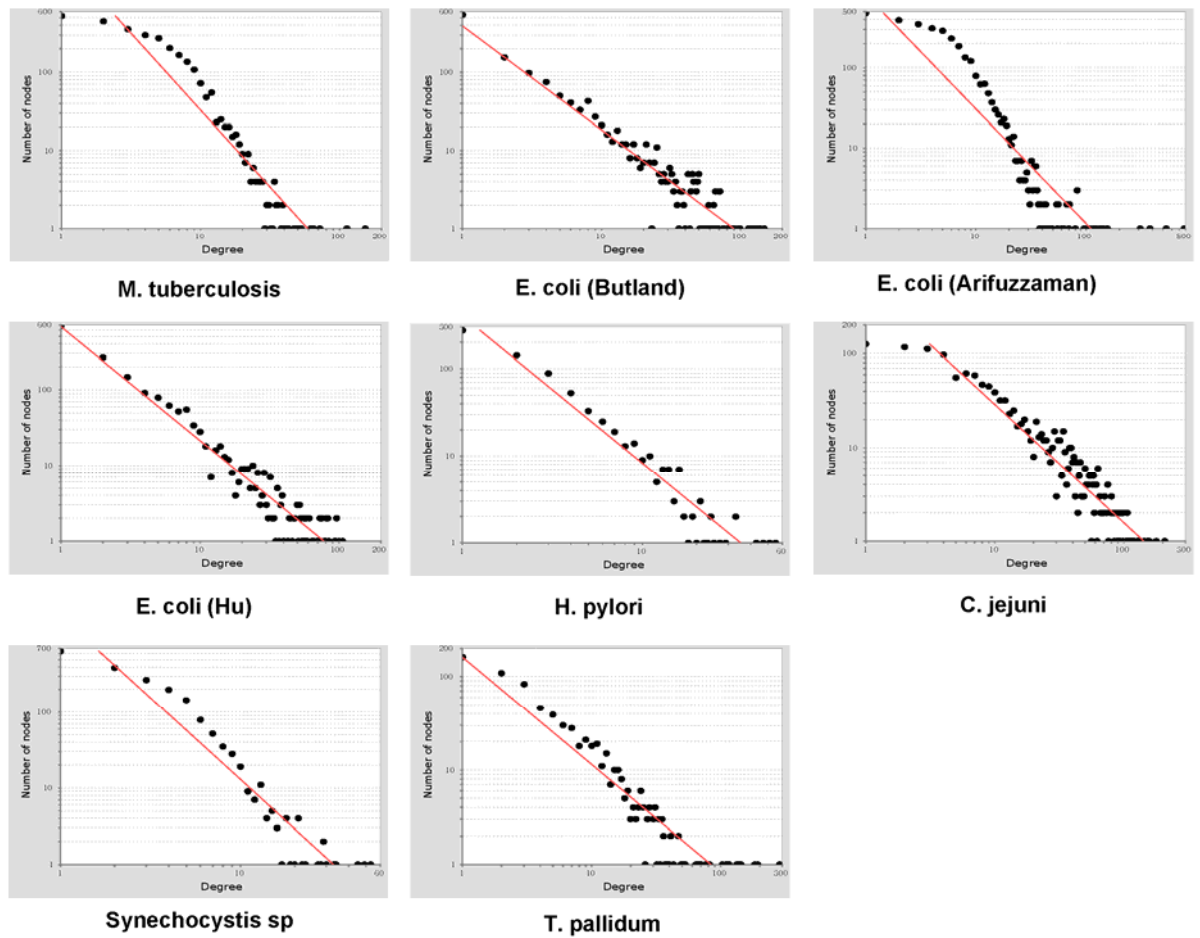

(A) Degree distribution of *M. tuberculosis* B2H and reference protein interaction networks. The node degree of a node  $n$  is the number of edges linked to  $n$ . The node degree distribution gives the number of nodes with degree  $k$ . Power law distribution of node degree indicate the scale-free property of networks.

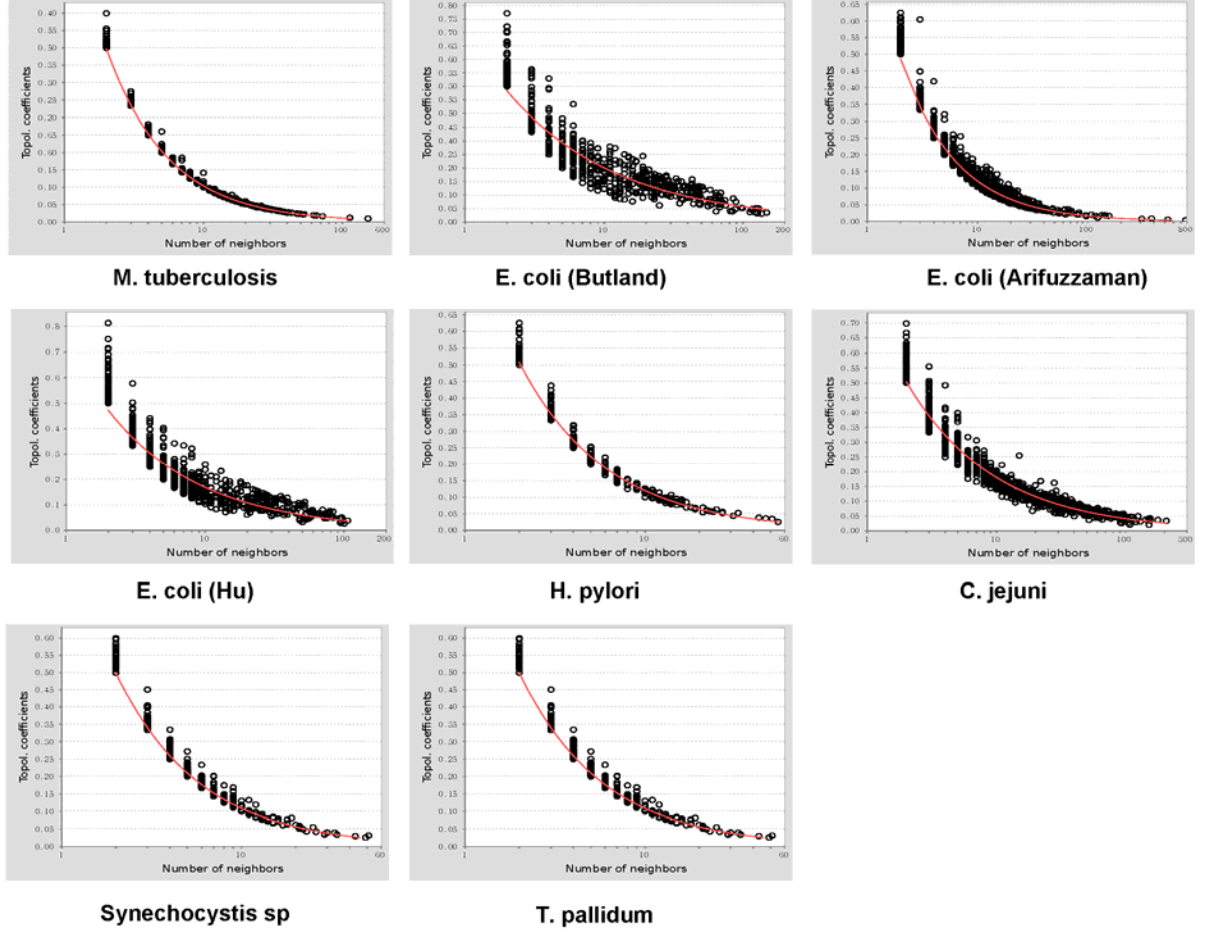

(B) Topological coefficient distribution of *M. tuberculosis* B2H and reference protein interaction networks. The topological coefficient  $T_n$  of a node  $n$  with  $k_n$  neighbors is computed as follows:  $T_n = \text{avg} ( J(n,m) ) / k_n$ . Here,  $J(n,m)$  is defined for all nodes  $m$  that share at least one neighbor with  $n$ . The value  $J(n,m)$  is the number of neighbors shared between the nodes  $n$  and  $m$ , plus one if there is a direct link between  $n$  and  $m$  (Stelzl *et al*, 2005).

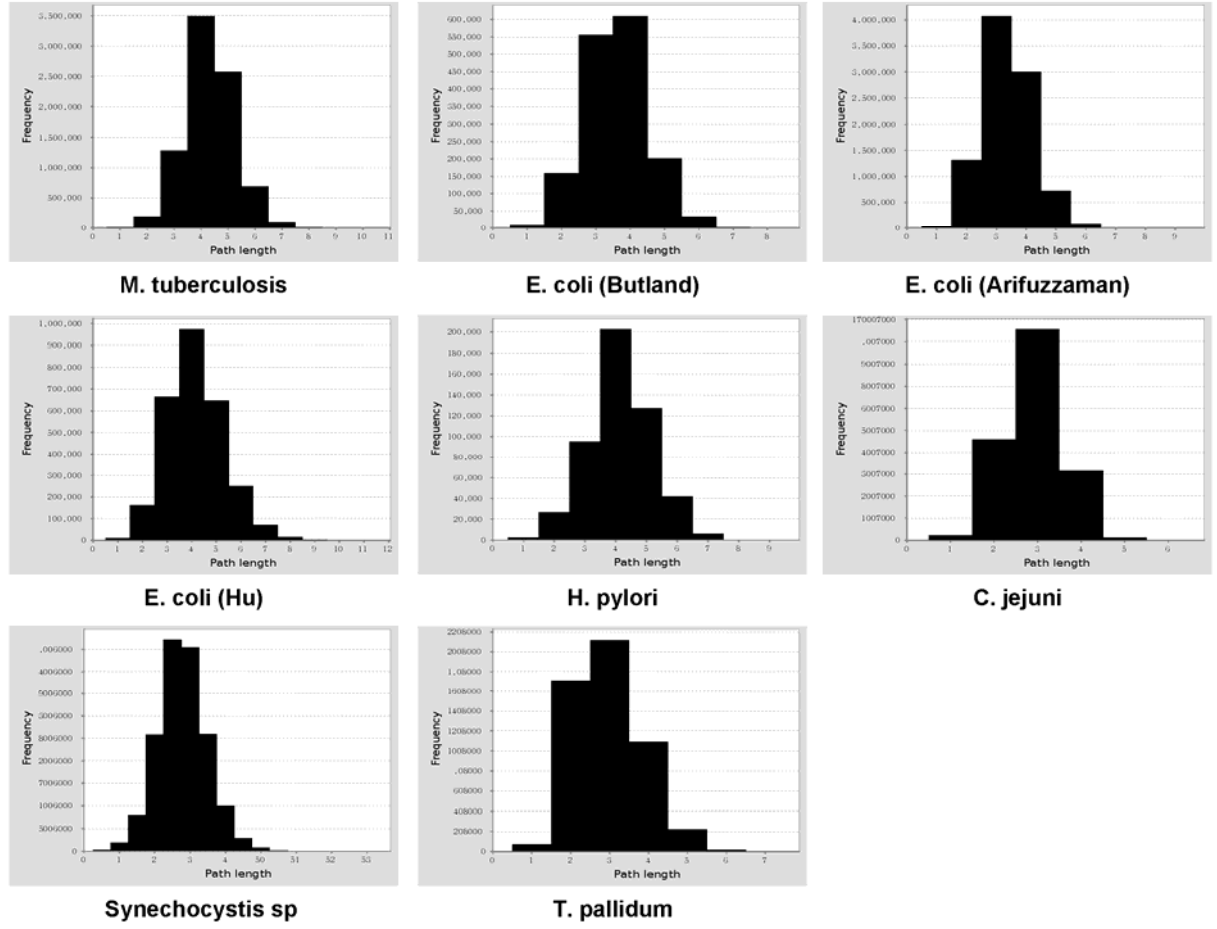

(C) Shortest path length distribution of *M. tuberculosis* B2H and reference protein interaction networks. The shortest path length distribution gives the number of node pairs  $(n,m)$  with  $L(n,m) = k$ .

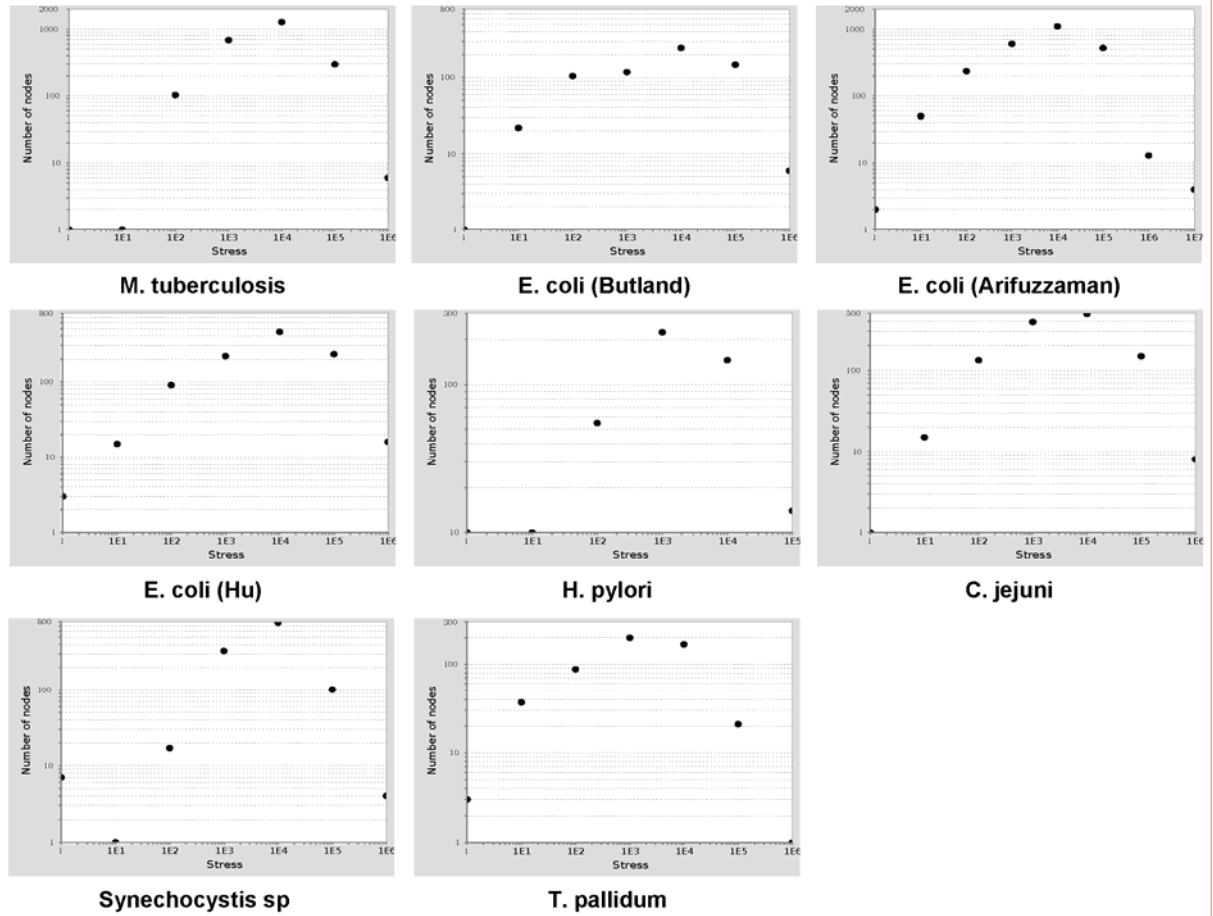

(D) Stress distribution of *M. tuberculosis* B2H and reference protein interaction networks. The stress of a node  $n$  is the number of shortest paths passing through  $n$ . The stress distribution gives the number of nodes with stress  $s$  for different values of  $s$ . The values for the stress are grouped into bins whose size grows exponentially by a factor of 10. The bins used for this distribution are  $\{0\}$ ;  $[1, 10)$ ;  $[10, 100)$ ; ...

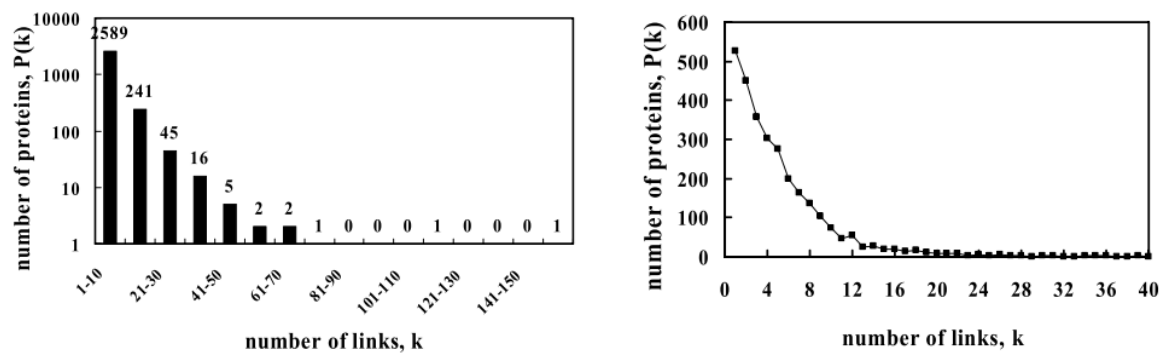

(E) The degree distribution of B2H networks in interval (left panel). The degree distribution of B2H networks with links  $k$  from 1 to 40 (right panel).

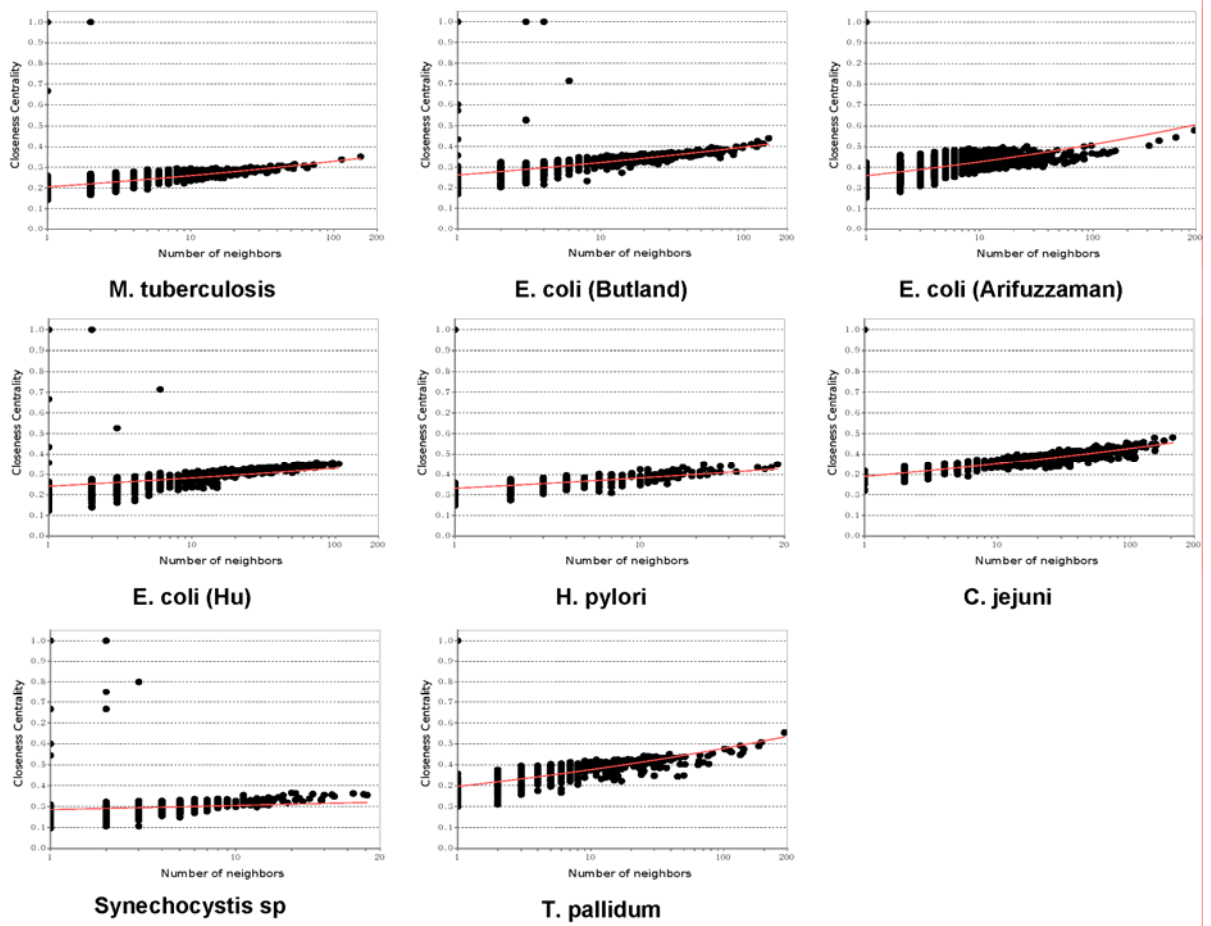

(F) Closeness centrality distribution of *M. tuberculosis* B2H and reference protein interaction networks. The closeness centrality was plotted against the number of neighbors. The closeness centrality  $Cc(n)$  of a node  $n$  is defined as the reciprocal of the average shortest path length and is computed as follows:  $Cc(n) = 1 / \text{avg}(L(n,m))$ , where  $L(n,m)$  is the length of the shortest path between two nodes  $n$  and  $m$ . Closeness centrality is a measure of how fast information spreads from a given node to other reachable nodes in the network.

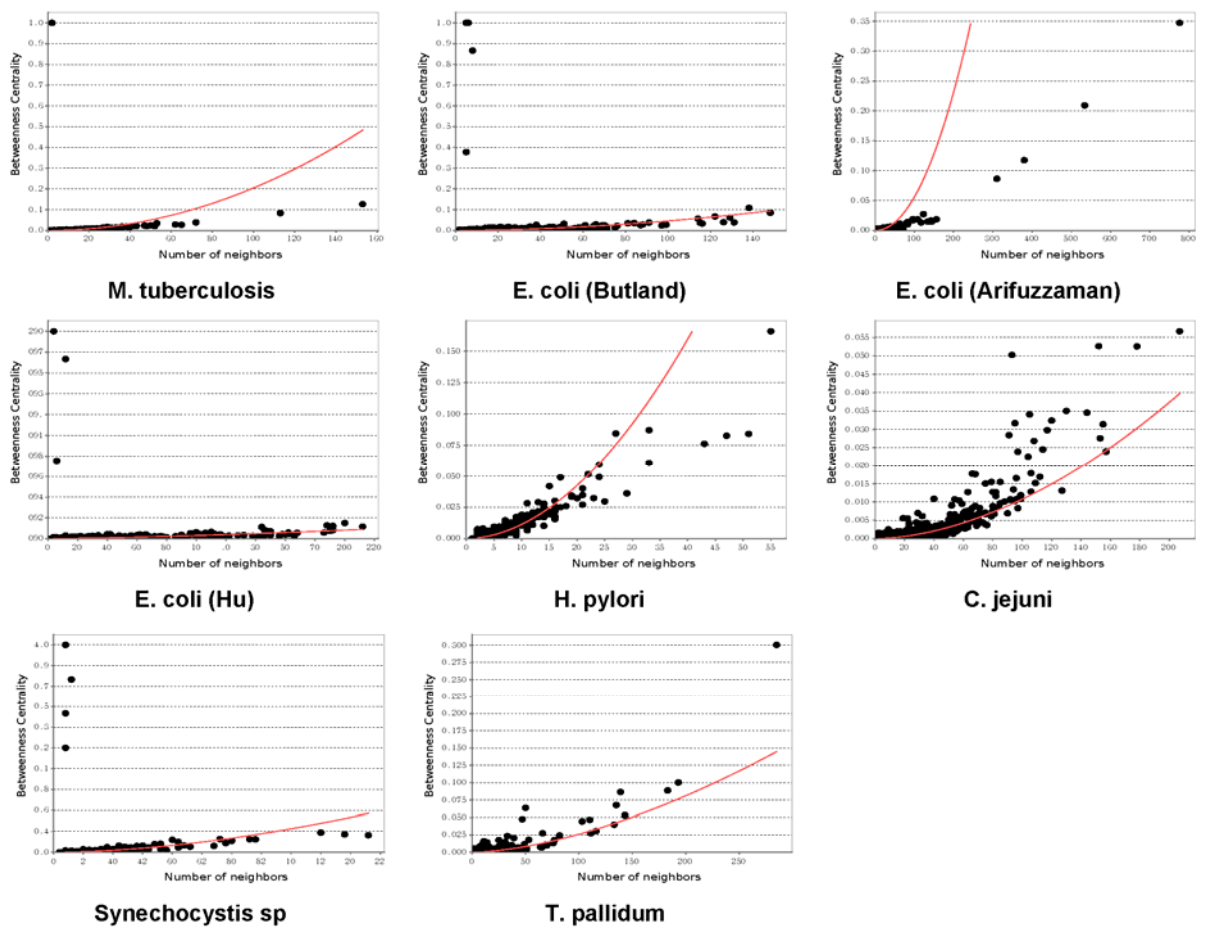

(G) The betweenness centrality distribution of *M. tuberculosis* B2H and reference interaction networks.

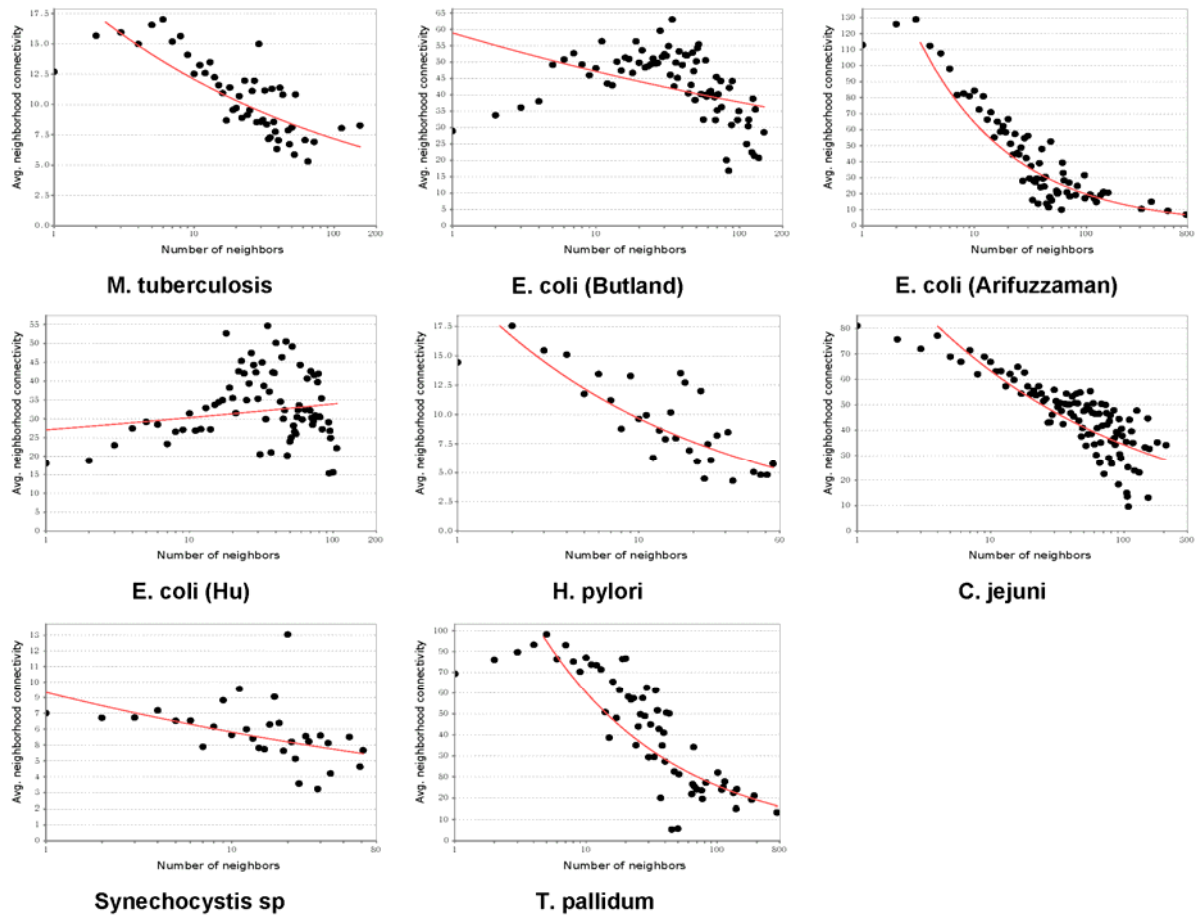

(H) The neighborhood connectivity distribution of *M. tuberculosis* B2H and reference interaction network. The connectivity of a node is the number of its neighbors. The neighborhood connectivity of a node  $n$  is defined as the average connectivity of all neighbors of  $n$  (Maslov *et al*, 2002). The neighborhood connectivity distribution gives the average of the neighborhood connectivities of all nodes  $n$  with  $k$  neighbors for  $k$ .



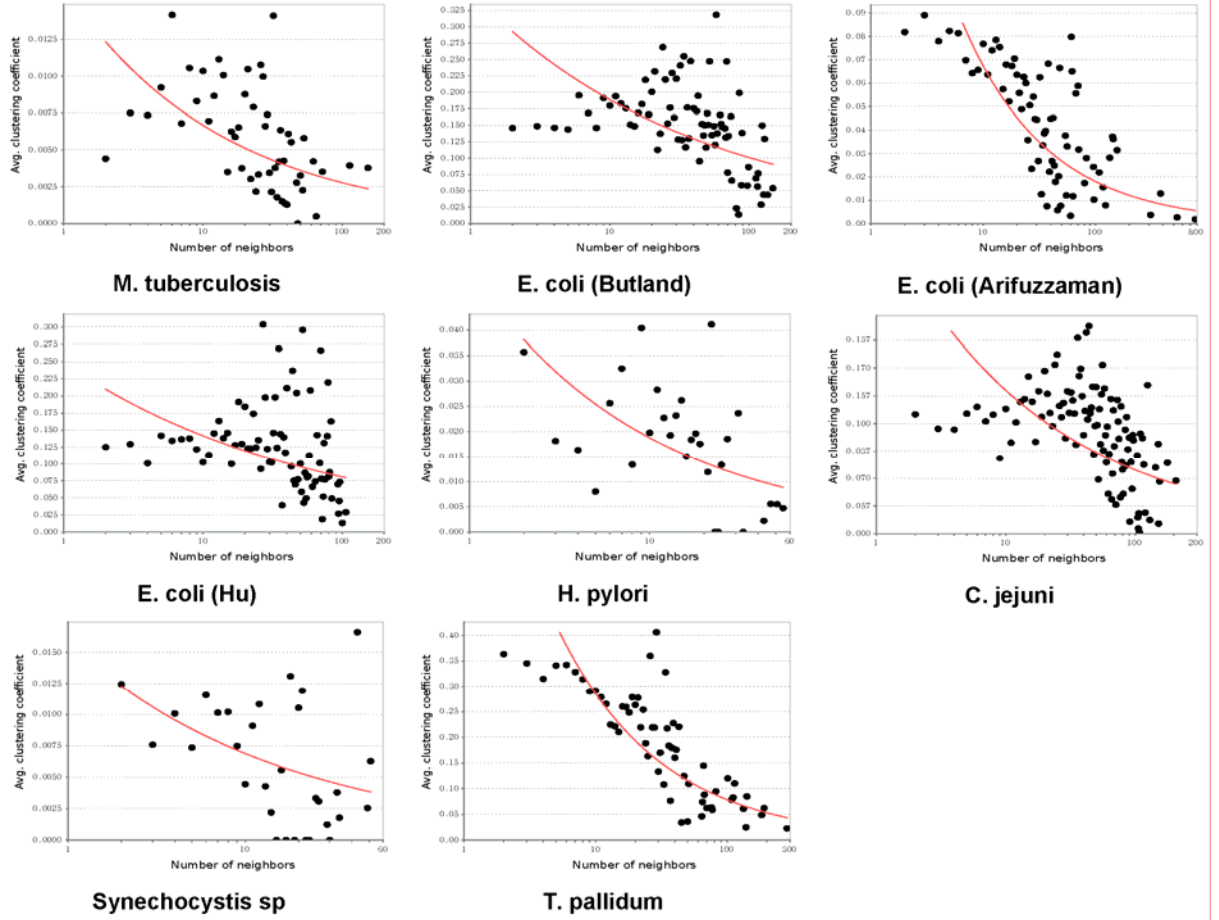

(I) The average clustering coefficient distribution of *M. tuberculosis* B2H and reference interaction networks. The clustering coefficient  $C_n$  of a node  $n$  is defined as  $C_n = 2e_n/(k_n(k_n-1))$ , where  $k_n$  is the number of neighbors of  $n$  and  $e_n$  is the number of connected pairs between all neighbors of  $n$  (Barabási *et al*, 2004; Watts *et al*, 1998).

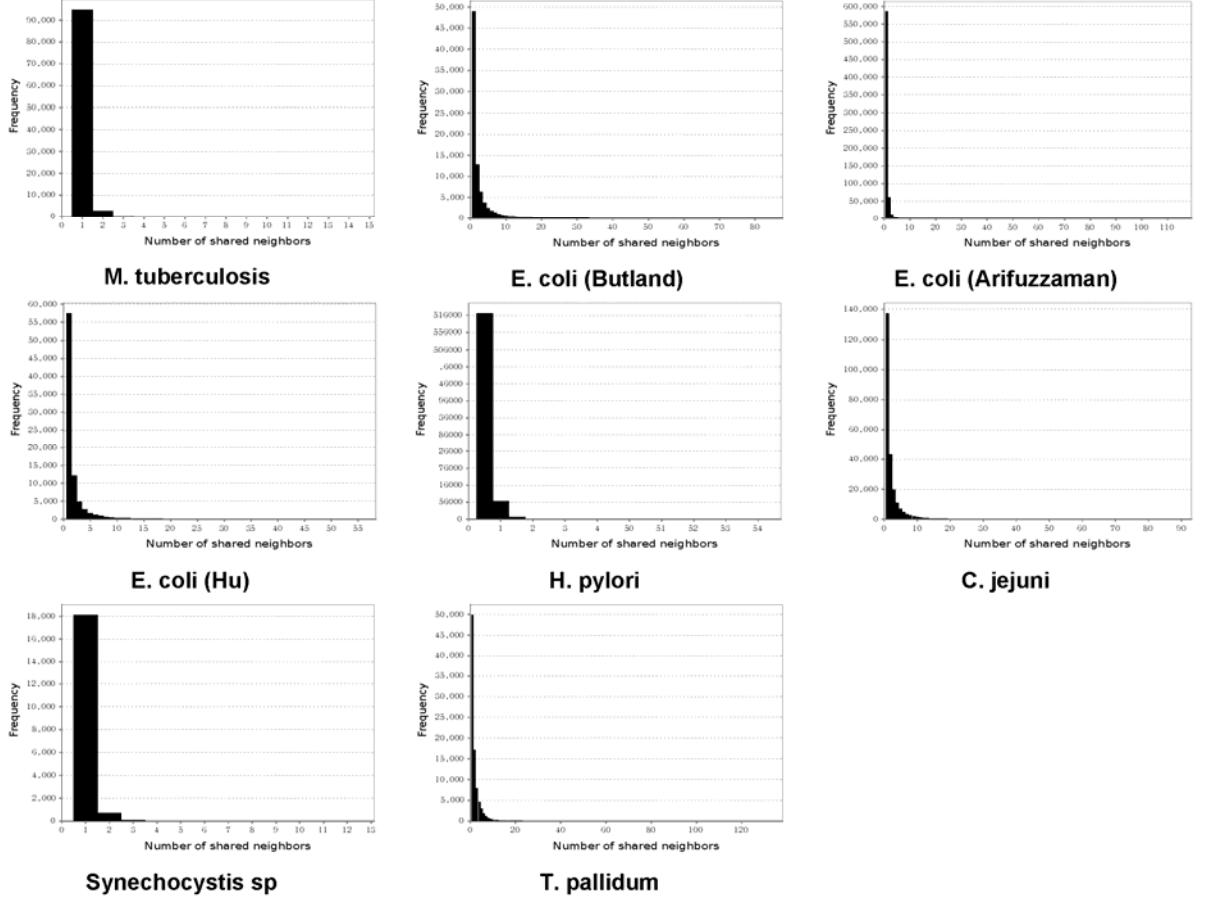

(J) The distribution of shared neighbors for *M. tuberculosis* B2H and reference interaction networks. Shared neighbors  $P(n,m)$  is the number of partners shared between the nodes  $n$  and  $m$ , that is, nodes that are neighbors of both  $n$  and  $m$ . The shared neighbors distribution gives the number of node pairs  $(n,m)$  with  $P(n,m) = k$ .
